# Supplementary material for: Novel gain-of-function mutation of TRPV4 associated with accelerated chondrogenic differentiation of dental pulp stem cells derived from a patient with metatropic dysplasia
Source: PubMed Central journal article supplement (PMC6709385; doi:10.1016/j.bbrep.2019.100648), 2019-05-17
Supplement: mmc1.pdf [file mmc1.pdf]

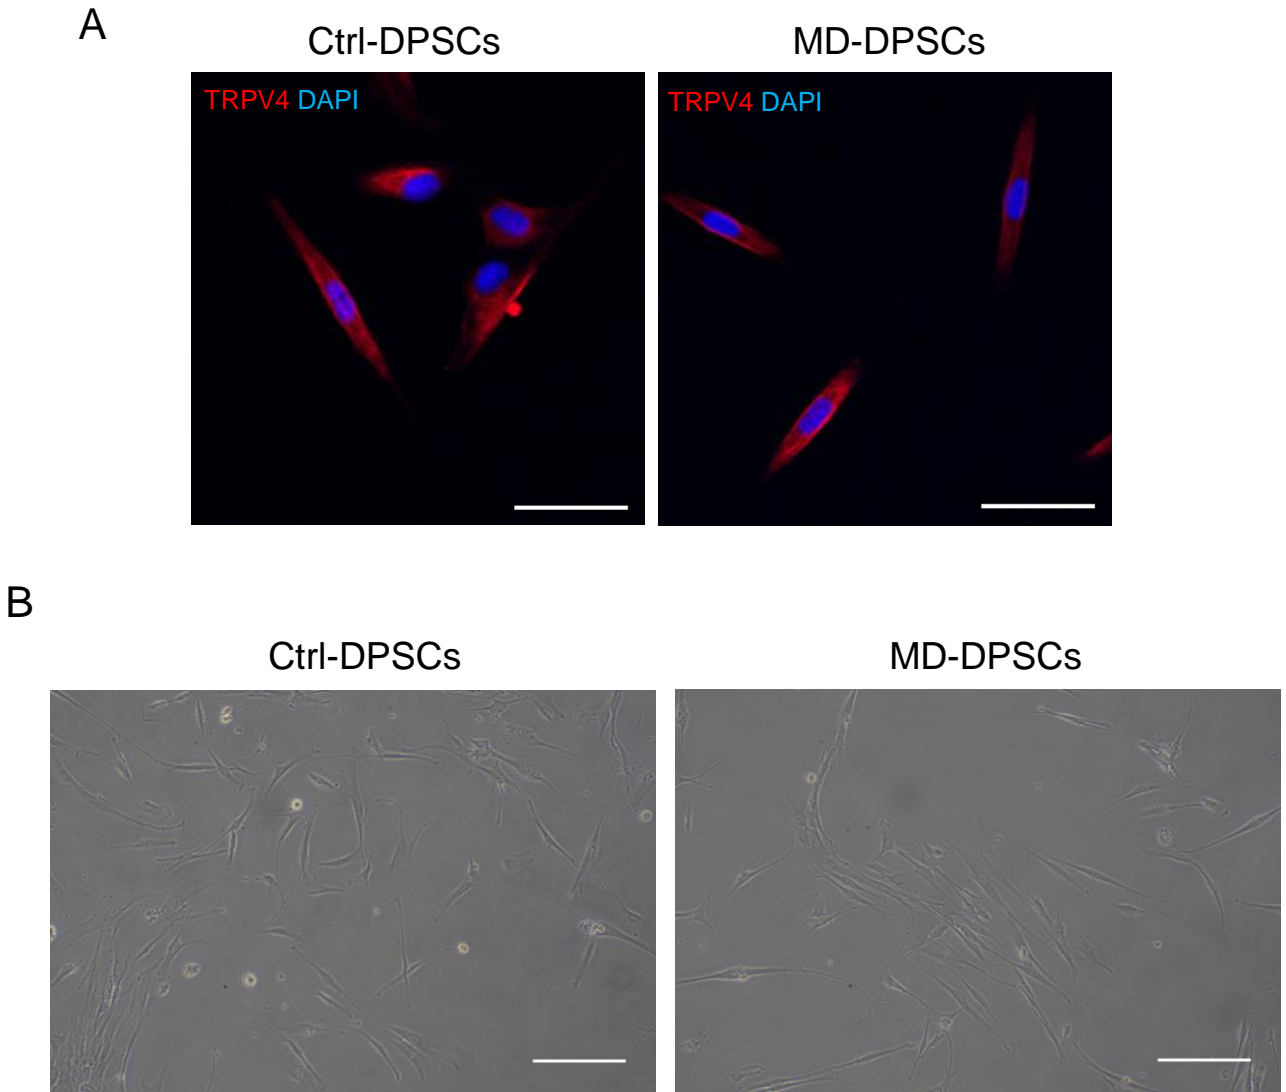

Supplemental figure. TRPV4 expression and morphology of DPSCs. (A) The expression of TRPV4 in DPSCs analyzed with immunocytochemistry. Lower magnification of Fig.2C. Scale bar = 50  $\mu$ m. (B) Morphology of DPSCs was observed using a phase-contrast microscope. Scale bar = 200  $\mu$ m.
